# Supplementary material for: Different bacterial communities in ectomycorrhizae and surrounding soil
Source: PubMed Central journal article supplement — Sci Rep. 2013 Dec 11;3:3471. doi: 10.1038/srep03471 (PMC3858787; doi:10.1038/srep03471), 2013-12-11
Supplement: srep03471-s1.pdf [file srep03471-s1.pdf]

## Different bacterial communities in ectomycorrhizae and surrounding soil.

Vik, Unni<sup>1</sup> Logares, Ramiro<sup>2</sup> Błaalid, Rakel<sup>2</sup> Halvorsen, Rune<sup>2</sup> Carlsen, Tor<sup>2</sup> Bakke, Ingrid<sup>2</sup> Kolstø, Anne-Brit Økstad, Ole Andreas<sup>2</sup> Kausrud, Håvard<sup>2</sup>

### Supplementary information.

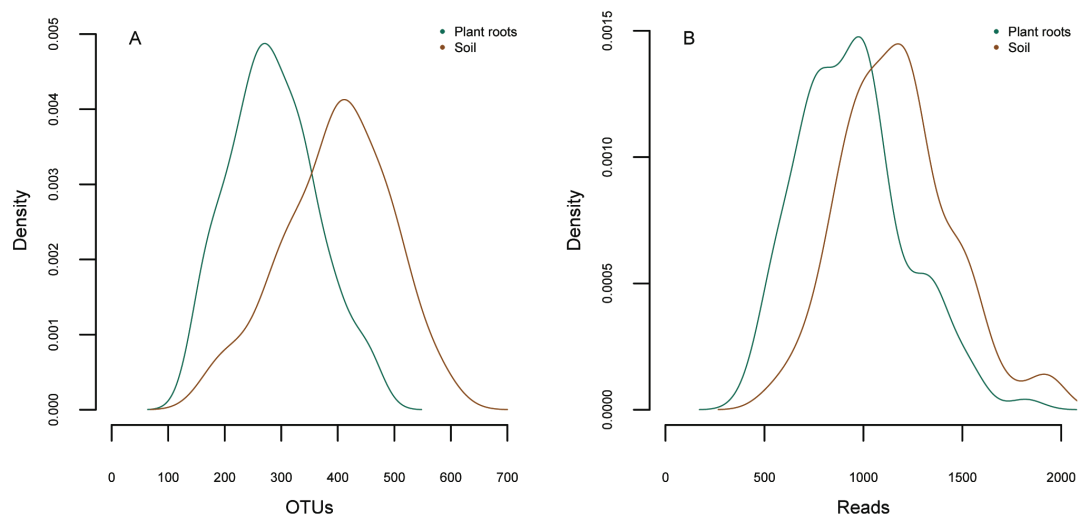

**Figure S1.** Density plot of distribution of bacterial A) OTUs and B) reads in the 115 plant root systems of *B. vivipara* (green) and the 63 adjacent soil samples (brown).

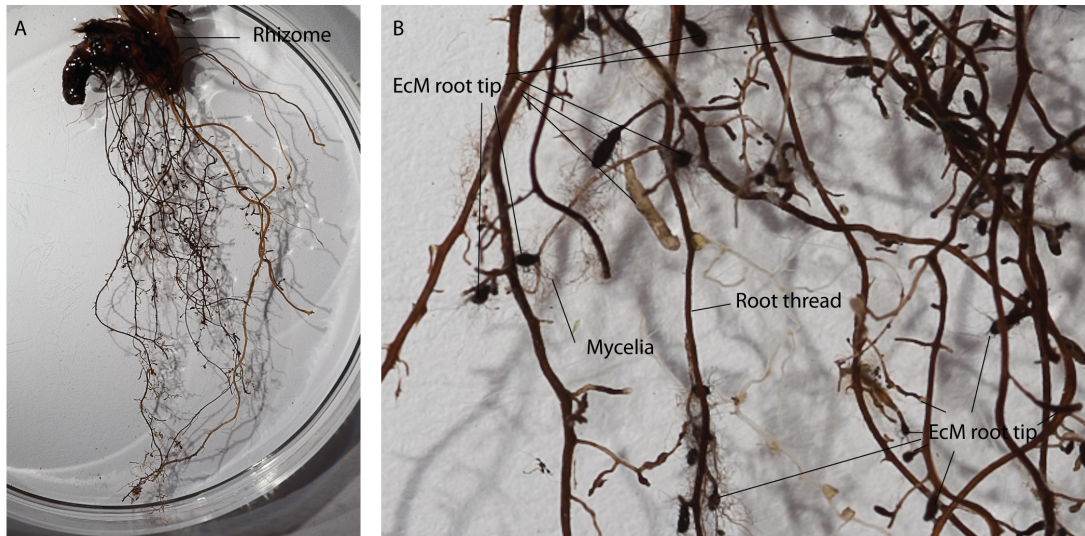

**Figure S2.** A shows a typical *Bistorta vivipara* root system attached to the rhizome. B shows a magnified part of A, where the root thread, EcM tips and mycelia are highlighted.

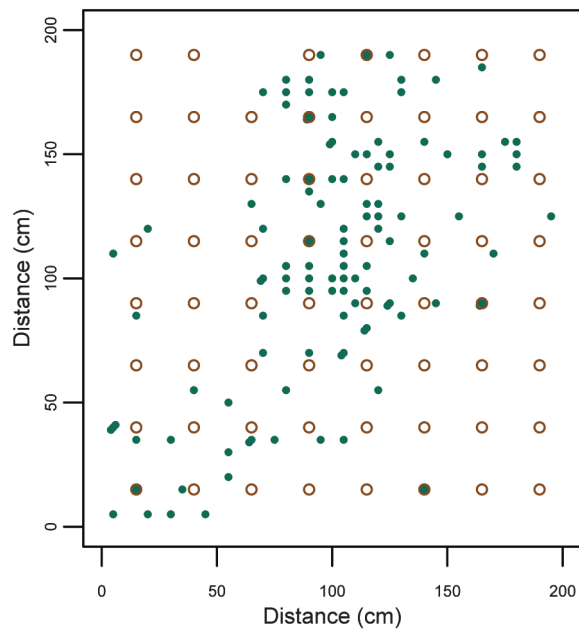

**Figure S3.** The sampled plot of *Bistorta vivipara* root systems (green filled circles) and soil samples (brown open circles). Certain places, there was an overlap between the plant samples and soil samples. Samples that were not included in downstream analyses are removed from the plot.

**Table S1.** G-test of independence of the bacterial OTUs appearing in the 115 *Bistorta vivipara* plant root samples and 63 soil samples.

| OTU  | g_prob   | Bonferroni<br>corrected<br>probability | Pla<br>nt_<br>ob<br>s | Plant<br>_est | Percent<br>of obs | soil<br>_o<br>bs | soil_est | Percent<br>of obs | Phyla           | Class           | Order                 | Family                 |
|------|----------|----------------------------------------|-----------------------|---------------|-------------------|------------------|----------|-------------------|-----------------|-----------------|-----------------------|------------------------|
| 2911 | 6.74E-12 | 1.35E-09                               | 51                    | 32.95         | 154.78            | 0                | 18.05    | 0.00              | AD3             | JG37-AG-4       | Unknown               | Unknown                |
| 6114 | 6.74E-12 | 1.35E-09                               | 51                    | 32.95         | 154.78            | 0                | 18.05    | 0.00              | Chloroflexi     | Anaerolineae    | Unknown               | Unknown                |
| 7763 | 6.74E-12 | 1.35E-09                               | 51                    | 32.95         | 154.78            | 0                | 18.05    | 0.00              | Chloroflexi     | Ktedonobacteria | Thermogemmatisporales | Unknown                |
| 9113 | 2.52E-15 | 5.05E-13                               | 62                    | 40.06         | 154.78            | 0                | 21.94    | 0.00              | Chloroflexi     | Unknown         | Unknown               | Unknown                |
| 4988 | 4.86E-11 | 9.73E-09                               | 48                    | 31.01         | 154.78            | 0                | 16.99    | 0.00              | Actinobacteria  | Actinobacteria  | Actinomycetales       | Micromonosporaceae     |
| 491  | 3.77E-18 | 7.54E-16                               | 70                    | 45.22         | 154.78            | 0                | 24.78    | 0.00              | Actinobacteria  | Actinobacteria  | Actinomycetales       | Microbacteriaceae      |
| 638  | 1.74E-12 | 3.48E-10                               | 53                    | 34.24         | 154.78            | 0                | 18.76    | 0.00              | Armatimonadetes | Armatimonadia   | Armatimonadales       | Armatimonadaceae       |
| 3139 | 5.26E-25 | 1.05E-22                               | 86                    | 55.56         | 154.78            | 0                | 30.44    | 0.00              | Chloroflexi     | Ktedonobacteria | Thermogemmatisporales | Unknown                |
| 1232 | 8.86E-18 | 1.77E-15                               | 69                    | 44.58         | 154.78            | 0                | 24.42    | 0.00              | Unknown         | Unknown         | Unknown               | Unknown                |
| 8523 | 9.26E-11 | 1.85E-08                               | 47                    | 30.37         | 154.78            | 0                | 16.63    | 0.00              | Unknown         | Unknown         | Unknown               | Unknown                |
| 606  | 5.05E-14 | 1.01E-11                               | 58                    | 37.47         | 154.78            | 0                | 20.53    | 0.00              | Chloroflexi     | Ktedonobacteria | Thermogemmatisporales | Unknown                |
| 4680 | 1.66E-25 | 3.32E-23                               | 87                    | 56.21         | 154.78            | 0                | 30.79    | 0.00              | Chloroflexi     | Ktedonobacteria | Thermogemmatisporales | Unknown                |
| 1686 | 9.07E-22 | 1.81E-19                               | 79                    | 51.04         | 154.78            | 0                | 27.96    | 0.00              | Acidobacteria   | Acidobacteria   | Acidobacteriales      | Koribacteraceae        |
| 8581 | 2.54E-11 | 5.07E-09                               | 49                    | 31.66         | 154.78            | 0                | 17.34    | 0.00              | Chloroflexi     | Ktedonobacteria | Thermogemmatisporales | Unknown                |
| 6952 | 2.54E-11 | 5.07E-09                               | 49                    | 31.66         | 154.78            | 0                | 17.34    | 0.00              | Chloroflexi     | Ktedonobacteria | Thermogemmatisporales | Thermogemmatisporaceae |
| 1256 | 1.04E-13 | 2.09E-11                               | 57                    | 36.83         | 154.78            | 0                | 20.17    | 0.00              | Chloroflexi     | Ktedonobacteria | Thermogemmatisporales | Thermogemmatisporaceae |
| 9042 | 1.75E-10 | 3.50E-08                               | 46                    | 29.72         | 154.78            | 0                | 16.28    | 0.00              | Unknown         | Unknown         | Unknown               | Unknown                |
| 8079 | 8.71E-13 | 1.74E-10                               | 54                    | 34.89         | 154.78            | 0                | 19.11    | 0.00              | Unknown         | Unknown         | Unknown               | Unknown                |
| 7662 | 7.08E-17 | 1.42E-14                               | 72                    | 47.16         | 152.66            | 1                | 25.84    | 3.87              | Chloroflexi     | Ktedonobacteria | Thermogemmatisporales | Unknown                |
| 1018 | 1.01E-13 | 2.01E-11                               | 63                    | 41.35         | 152.36            | 1                | 22.65    | 4.41              | Chloroflexi     | Ktedonobacteria | Thermogemmatisporales | Unknown                |
| 7767 | 1.54E-11 | 3.07E-09                               | 56                    | 36.83         | 152.07            | 1                | 20.17    | 4.96              | TM7             | TM7-1           | Unknown               | Unknown                |
| 5493 | 2.21E-10 | 4.43E-08                               | 52                    | 34.24         | 151.86            | 1                | 18.76    | 5.33              | TM7             | TM7-1           | Unknown               | Unknown                |
| 1573 | 2.79E-09 | 5.58E-07                               | 48                    | 31.66         | 151.62            | 1                | 17.34    | 5.77              | Unknown         | Unknown         | Unknown               | Unknown                |

|      |            |            |     |       |        |    |       |       |                 |                     |                       |                        |
|------|------------|------------|-----|-------|--------|----|-------|-------|-----------------|---------------------|-----------------------|------------------------|
| 2629 | 5.15E-09   | 1.03E-06   | 47  | 31.01 | 151.56 | 1  | 16.99 | 5.89  | Unknown         | Unknown             | Unknown               | Unknown                |
| 2928 | 3.10E-08   | 6.20E-06   | 44  | 29.07 | 151.34 | 1  | 15.93 | 6.28  | Chloroflexi     | Ktedonobacteria     | Thermogemmatisporales | Unknown                |
| 926  | 4.56E-16   | 9.12E-14   | 77  | 51.69 | 148.98 | 3  | 28.31 | 10.60 | Unknown         | Unknown             | Unknown               | Unknown                |
| 7449 | 6.84E-09   | 1.37E-06   | 51  | 34.24 | 148.94 | 2  | 18.76 | 10.66 | Actinobacteria  | Actinobacteria      | Actinomycetales       | Unknown                |
| 5693 | 1.26E-08   | 2.52E-06   | 50  | 33.60 | 148.83 | 2  | 18.40 | 10.87 | Chloroflexi     | Ktedonobacteria     | Thermogemmatisporales | Thermogemmatisporaceae |
| 5564 | 1.26E-08   | 2.52E-06   | 50  | 33.60 | 148.83 | 2  | 18.40 | 10.87 | Acidobacteria   | Acidobacteria       | Acidobacteriales      | Koribacteraceae        |
| 7770 | 7.66E-13   | 1.53E-10   | 68  | 45.87 | 148.24 | 3  | 25.13 | 11.94 | Armatimonadetes | Armatimonadia       | Armatimonadales       | Armatimonadaceae       |
| 8371 | 6.02E-11   | 1.20E-08   | 62  | 41.99 | 147.64 | 3  | 23.01 | 13.04 | Armatimonadetes | Chthonomonadetes    | Chthonomonadales      | Chthonomonadaceae      |
| 7390 | 1.64E-16   | 3.28E-14   | 81  | 54.92 | 147.50 | 4  | 30.08 | 13.30 | Acidobacteria   | Unknown             | Unknown               | Unknown                |
| 4092 | 8.33E-12   | 1.67E-09   | 68  | 46.52 | 146.18 | 4  | 25.48 | 15.70 | Proteobacteria  | Betaproteobacteria  | Burkholderiales       | Comamonadaceae         |
| 1578 | 3.50E-22   | 6.99E-20   | 99  | 68.48 | 144.56 | 7  | 37.52 | 18.66 | TM7             | TM7-1               | Unknown               | Unknown                |
| 3490 | 4.69E-08   | 9.39E-06   | 55  | 38.12 | 144.29 | 4  | 20.88 | 19.16 | Actinobacteria  | Actinobacteria      | Actinomycetales       | Kineosporiaceae        |
| 1339 | 2.42E-06   | 0.00048345 | 48  | 33.60 | 142.88 | 4  | 18.40 | 21.73 | Actinobacteria  | Actinobacteria      | Actinomycetales       | Micromonosporaceae     |
| 1069 | 3.52E-20   | 7.05E-18   | 99  | 69.78 | 141.88 | 9  | 38.22 | 23.54 | Chloroflexi     | Ktedonobacteria     | Thermogemmatisporales | Thermogemmatisporaceae |
| 8948 | 3.08E-05   | 0.00616465 | 43  | 30.37 | 141.61 | 4  | 16.63 | 24.05 | Planctomycetes  | Planctomycetia      | Gemmatales            | Gemmataceae            |
| 3278 | 2.75E-07   | 5.49E-05   | 58  | 41.35 | 140.27 | 6  | 22.65 | 26.49 | Bacteroidetes   | Sphingobacteria     | Sphingobacteriales    | Chitinophagaceae       |
| 7759 | 1.23E-05   | 0.0024663  | 48  | 34.24 | 140.18 | 5  | 18.76 | 26.65 | Armatimonadetes | Armatimonadia       | Armatimonadales       | Armatimonadaceae       |
| 3911 | 4.86E-07   | 9.71E-05   | 57  | 40.70 | 140.04 | 6  | 22.30 | 26.91 | Actinobacteria  | Actinobacteria      | Actinomycetales       | Unknown                |
| 8656 | 2.03E-05   | 0.00405981 | 47  | 33.60 | 139.90 | 5  | 18.40 | 27.17 | Chloroflexi     | Ktedonobacteria     | Thermogemmatisporales | Thermogemmatisporaceae |
| 4117 | 2.52E-10   | 5.04E-08   | 74  | 52.98 | 139.68 | 8  | 29.02 | 27.56 | Proteobacteria  | Gammaproteobacteria | Xanthomonadales       | Sinobacteraceae        |
| 4201 | 4.19E-07   | 8.38E-05   | 60  | 43.29 | 138.61 | 7  | 23.71 | 29.52 | Actinobacteria  | Actinobacteria      | Actinomycetales       | Actinospicaceae        |
| 4530 | 0.00021384 | 0.04276867 | 42  | 30.37 | 138.32 | 5  | 16.63 | 30.06 | Unknown         | Unknown             | Unknown               | Unknown                |
| 9428 | 5.88E-07   | 0.00011757 | 62  | 45.22 | 137.09 | 8  | 24.78 | 32.29 | Planctomycetes  | Phycisphaerae       | Unknown               | Unknown                |
| 7342 | 1.25E-08   | 2.50E-06   | 73  | 53.62 | 136.13 | 10 | 29.38 | 34.04 | TM7             | TM7-1               | Unknown               | Unknown                |
| 5660 | 3.93E-05   | 0.00786747 | 54  | 40.06 | 134.81 | 8  | 21.94 | 36.46 | Unknown         | Unknown             | Unknown               | Unknown                |
| 6129 | 4.06E-22   | 8.11E-20   | 111 | 82.70 | 134.23 | 17 | 45.30 | 37.52 | Armatimonadetes | Armatimonadia       | Armatimonadales       | Armatimonadaceae       |
| 6597 | 4.41E-14   | 8.83E-12   | 101 | 76.88 | 131.37 | 18 | 42.12 | 42.74 | Armatimonadetes | Armatimonadia       | Armatimonadales       | Armatimonadaceae       |

|      |            |            |     |       |        |    |       |        |                 |                     |                        |                         |
|------|------------|------------|-----|-------|--------|----|-------|--------|-----------------|---------------------|------------------------|-------------------------|
| 8727 | 0.00015693 | 0.03138575 | 56  | 42.64 | 131.33 | 10 | 23.36 | 42.81  | Proteobacteria  | Alphaproteobacteria | Rhizobiales            | Rhizobiaceae            |
| 1618 | 1.99E-14   | 3.99E-12   | 104 | 80.11 | 129.82 | 20 | 43.89 | 45.57  | Chloroflexi     | Ktedonobacteria     | Thermogemmatissporales | Unknown                 |
| 1669 | 3.36E-18   | 6.71E-16   | 113 | 89.16 | 126.74 | 25 | 48.84 | 51.18  | Chloroflexi     | Ktedonobacteria     | Thermogemmatissporales | Thermogemmatissporaceae |
| 3484 | 2.25E-14   | 4.50E-12   | 108 | 85.28 | 126.64 | 24 | 46.72 | 51.37  | Actinobacteria  | Actinobacteria      | Actinomycetales        | Unknown                 |
| 7230 | 1.62E-06   | 0.00032341 | 83  | 65.90 | 125.95 | 19 | 36.10 | 52.63  | AD3             | JG37-AG-4           | Unknown                | Unknown                 |
| 9553 | 2.30E-08   | 4.60E-06   | 99  | 80.76 | 122.59 | 26 | 44.24 | 58.77  | WPS-2           | Unknown             | Unknown                | Unknown                 |
| 5354 | 1.02E-10   | 2.04E-08   | 108 | 89.16 | 121.13 | 30 | 48.84 | 61.42  | Chloroflexi     | Ktedonobacteria     | Thermogemmatissporales | Thermogemmatissporaceae |
| 5212 | 1.09E-05   | 0.00217694 | 106 | 93.03 | 113.94 | 38 | 50.97 | 74.56  | Actinobacteria  | Actinobacteria      | Actinomycetales        | Streptomycetaceae       |
| 262  | 5.00E-05   | 0.0099923  | 73  | 85.28 | 85.60  | 59 | 46.72 | 126.29 | Verrucomicrobia | Spartobacteria      | Chthoniobacterales     | Chthoniobacteraceae     |
| 7445 | 6.34E-05   | 0.01267464 | 62  | 75.59 | 82.02  | 55 | 41.41 | 132.82 | Planctomycetes  | Planctomycetia      | Planctomycetales       | Planctomycetaceae       |
| 7712 | 0.00014433 | 0.02886601 | 52  | 65.90 | 78.91  | 50 | 36.10 | 138.50 | Proteobacteria  | Betaproteobacteria  | Ellin6067              | Unknown                 |
| 7540 | 5.73E-10   | 1.15E-07   | 50  | 69.78 | 71.66  | 58 | 38.22 | 151.73 | Acidobacteria   | Chloracidobacteria  | Unknown                | Unknown                 |
| 3746 | 2.97E-09   | 5.93E-07   | 47  | 66.54 | 70.63  | 56 | 36.46 | 153.61 | Unknown         | Unknown             | Unknown                | Unknown                 |
| 1078 | 4.64E-05   | 0.00927623 | 36  | 51.04 | 70.53  | 43 | 27.96 | 153.79 | Planctomycetes  | Phycisphaerae       | Unknown                | Unknown                 |
| 1475 | 2.15E-07   | 4.29E-05   | 40  | 58.15 | 68.79  | 50 | 31.85 | 156.97 | Planctomycetes  | Planctomycetia      | Gemmatales             | Isosphaeraceae          |
| 4908 | 1.63E-12   | 3.27E-10   | 48  | 69.78 | 68.79  | 60 | 38.22 | 156.97 | Acidobacteria   | iii1-8              | DS-18                  | Unknown                 |
| 4631 | 3.19E-09   | 6.38E-07   | 40  | 60.08 | 66.57  | 53 | 32.92 | 161.02 | Verrucomicrobia | Spartobacteria      | Chthoniobacterales     | Chthoniobacteraceae     |
| 5180 | 8.34E-06   | 0.00166788 | 28  | 43.93 | 63.73  | 40 | 24.07 | 166.20 | Planctomycetes  | Phycisphaerae       | Unknown                | Unknown                 |
| 2266 | 1.33E-06   | 0.00026539 | 30  | 47.16 | 63.61  | 43 | 25.84 | 166.43 | Planctomycetes  | Phycisphaerae       | Unknown                | Unknown                 |
| 7762 | 4.35E-07   | 8.71E-05   | 30  | 47.81 | 62.75  | 44 | 26.19 | 168.00 | Armatimonadetes | Chthonomonadetes    | Chthonomonadales       | Chthonomonadaceae       |
| 1240 | 7.91E-07   | 0.00015821 | 23  | 40.06 | 57.42  | 39 | 21.94 | 177.73 | Actinobacteria  | Actinobacteria      | Actinomycetales        | Intrasporangiaceae      |
| 5483 | 2.81E-12   | 5.62E-10   | 29  | 52.33 | 55.42  | 52 | 28.67 | 181.38 | Planctomycetes  | Phycisphaerae       | Unknown                | Unknown                 |
| 7087 | 7.91E-10   | 1.58E-07   | 25  | 45.87 | 54.50  | 46 | 25.13 | 183.05 | Planctomycetes  | Planctomycetia      | Pirellulales           | Pirellulaceae           |
| 5257 | 2.45E-11   | 4.89E-09   | 26  | 48.46 | 53.66  | 49 | 26.54 | 184.59 | Actinobacteria  | Acidimicrobiia      | Acidimicrobiales       | Unknown                 |
| 3792 | 5.45E-08   | 1.09E-05   | 21  | 39.41 | 53.29  | 40 | 21.59 | 185.27 | Planctomycetes  | Planctomycetia      | Gemmatales             | Gemmataceae             |
| 1392 | 1.13E-08   | 2.27E-06   | 22  | 41.35 | 53.21  | 42 | 22.65 | 185.42 | Planctomycetes  | Phycisphaerae       | Unknown                | Unknown                 |
| 443  | 1.19E-06   | 0.00023874 | 18  | 34.24 | 52.57  | 35 | 18.76 | 186.58 | Fusobacteria    | Fusobacteria        | Unknown                | Unknown                 |

|      |          |          |    |       |       |    |       |        |                |                    |               |                |
|------|----------|----------|----|-------|-------|----|-------|--------|----------------|--------------------|---------------|----------------|
| 524  | 1.38E-10 | 2.75E-08 | 20 | 41.35 | 48.37 | 44 | 22.65 | 194.25 | Acidobacteria  | Chloracidobacteria | Unknown       | Unknown        |
| 7197 | 2.07E-10 | 4.14E-08 | 19 | 40.06 | 47.43 | 43 | 21.94 | 195.95 | Acidobacteria  | Chloracidobacteria | Unknown       | Unknown        |
| 4616 | 1.27E-07 | 2.54E-05 | 13 | 29.72 | 43.74 | 33 | 16.28 | 202.69 | Proteobacteria | Betaproteobacteria | IS-44         | Unknown        |
| 7513 | 9.41E-12 | 1.88E-09 | 16 | 38.12 | 41.97 | 43 | 20.88 | 205.92 | Acidobacteria  | Acidobacteria-6    | iii1-15       | Unknown        |
| 7740 | 9.20E-10 | 1.84E-07 | 14 | 33.60 | 41.67 | 38 | 18.40 | 206.47 | Planctomycetes | Phycisphaerae      | Unknown       | Unknown        |
| 564  | 3.06E-14 | 6.13E-12 | 15 | 39.41 | 38.06 | 46 | 21.59 | 213.06 | WPS-2          | Unknown            | Unknown       | Unknown        |
| 2890 | 4.88E-09 | 9.75E-07 | 11 | 29.07 | 37.84 | 34 | 15.93 | 213.47 | Planctomycetes | Planctomycetia     | Gemmatales    | Gemmataceae    |
| 9005 | 1.11E-10 | 2.21E-08 | 11 | 31.01 | 35.47 | 37 | 16.99 | 217.79 | Planctomycetes | Planctomycetia     | Gemmatales    | Isosphaeraceae |
| 9272 | 8.04E-12 | 1.61E-09 | 10 | 31.01 | 32.25 | 38 | 16.99 | 223.68 | Planctomycetes | Planctomycetia     | Gemmatales    | Gemmataceae    |
| 7349 | 5.49E-18 | 1.10E-15 | 10 | 36.83 | 27.15 | 47 | 20.17 | 232.97 | Acidobacteria  | iii1-8             | DS-18         | Unknown        |
| 7597 | 1.33E-19 | 2.65E-17 | 10 | 38.12 | 26.23 | 49 | 20.88 | 234.65 | Planctomycetes | Planctomycetia     | Gemmatales    | Gemmataceae    |
| 5870 | 3.44E-21 | 6.88E-19 | 9  | 38.12 | 23.61 | 50 | 20.88 | 239.44 | Planctomycetes | Planctomycetia     | Gemmatales    | Gemmataceae    |
| 8137 | 7.18E-23 | 1.44E-20 | 8  | 38.12 | 20.99 | 51 | 20.88 | 244.23 | Planctomycetes | Phycisphaerae      | Unknown       | Unknown        |
| 6768 | 1.72E-16 | 3.45E-14 | 6  | 30.37 | 19.76 | 41 | 16.63 | 246.47 | Planctomycetes | Planctomycetia     | Gemmatales    | Gemmataceae    |
| 8870 | 9.00E-23 | 1.80E-20 | 6  | 35.53 | 16.89 | 49 | 19.47 | 251.72 | Acidobacteria  | Unknown            | Unknown       | Unknown        |
| 2262 | 1.14E-23 | 2.29E-21 | 6  | 36.18 | 16.58 | 50 | 19.82 | 252.27 | Nitrospirae    | Nitrospira         | Nitrospirales | Unknown        |
| 3873 | 6.09E-22 | 1.22E-19 | 2  | 29.07 | 6.88  | 43 | 15.93 | 269.98 | Acidobacteria  | Acidobacteria-6    | Unknown       | Unknown        |
| 4263 | 1.53E-28 | 3.05E-26 | 1  | 32.30 | 3.10  | 49 | 17.70 | 276.89 | AD3            | JG37-AG-4          | Unknown       | Unknown        |

---

**Table S2.** Accession numbers and species names for sequences used in primer design

| <b>Species name</b>           | <b>Group</b>        | <b>Accession number</b> |
|-------------------------------|---------------------|-------------------------|
| Uncultured acidobacterium     | Acidobacterium      | Z95734                  |
| <i>Corynebacterium bovis</i>  | Actinobacteria      | AF311417                |
| <i>Rhizobium</i> sp.          | Alphaproteobacteria | AF345540                |
| <i>Bacteroides fragilis</i>   | Bacteroidetes       | X83950                  |
| <i>Burkholderia gladioli</i>  | Betaproteobacteria  | S55001                  |
| <i>Kouleothrix aurantiaca</i> | Chloroflexi         | AB079638                |
| <i>Enterococcus</i> sp.       | Firmicutes          | AM884197                |
| Verrucomicrobia bacterium     | Verrucomicrobia     | S 002445559             |
| <i>Auxis rochei</i>           | Vertebrate          | AB193568                |
| <i>Arabidopsis thaliana</i>   | Flowering plant     | X16077                  |
| <i>Pfiesteria piscicida</i>   | Protist             | AF330617                |
| <i>Leucostoma personii</i>    | Sac fungi           | M83259                  |



**Table S3.** The OTUs that appeared in the negative control, and were removed in the downstream analyses. OTU gives the OTU ID, RS gives the average number of reads in each root sample, S gives the average number of reads in each soil sample. Neg gives the observed number of reads in the negative control. Phyla, class, order and family gives the taxonomic annotation of the OTU removed.

| OTU  | RS    | S     | Neg. | Phyla           | Class               | Order                 | Family               |
|------|-------|-------|------|-----------------|---------------------|-----------------------|----------------------|
| 6820 | 1.07  | 0.86  | 1    | Acidobacteria   | Acidobacteria-6     | iii1-15               | Unknown              |
| 3642 | 14.71 | 0.32  | 7    | Actinobacteria  | Actinobacteria      | Actinomycetales       | Microbacteriaceae    |
| 3925 | 0.04  | 0.00  | 1    | Actinobacteria  | Actinobacteria      | Actinomycetales       | Microbacteriaceae    |
| 7946 | 0.10  | 0.05  | 3    | Actinobacteria  | Actinobacteria      | Actinomycetales       | Microbacteriaceae    |
| 3449 | 0.47  | 0.00  | 1    | Actinobacteria  | Actinobacteria      | Actinomycetales       | Micrococcaceae       |
| 6222 | 0.11  | 4.21  | 2    | Actinobacteria  | Actinobacteria      | Actinomycetales       | Micrococcaceae       |
| 7498 | 0.14  | 0.38  | 3    | Actinobacteria  | Actinobacteria      | Actinomycetales       | Propionibacteriaceae |
| 7642 | 0.05  | 0.11  | 2    | Actinobacteria  | Actinobacteria      | Actinomycetales       | Propionibacteriaceae |
| 8460 | 3.92  | 2.29  | 32   | Actinobacteria  | Actinobacteria      | Actinomycetales       | Propionibacteriaceae |
| 2328 | 0.10  | 0.00  | 1    | Actinobacteria  | Actinobacteria      | Actinomycetales       | Unknown              |
| 7930 | 2.68  | 0.00  | 3    | Actinobacteria  | Actinobacteria      | Actinomycetales       | Unknown              |
| 4188 | 0.00  | 0.21  | 1    | Actinobacteria  | Actinobacteria      | Actinomycetales       | Yaniellaceae         |
| 739  | 0.09  | 0.05  | 16   | Armatimonadetes | Chthonomonadetes    | Chthonomonadales      | Chthonomonadaceae    |
| 1082 | 0.02  | 0.02  | 6    | Armatimonadetes | Chthonomonadetes    | Chthonomonadales      | Chthonomonadaceae    |
| 8893 | 0.02  | 0.08  | 80   | Bacteroidetes   | Sphingobacteriia    | Sphingobacteriales    | Chitinophagaceae     |
| 5441 | 2.09  | 46.00 | 1    | Chloroflexi     | Ellin6529           | Unknown               | Unknown              |
| 1887 | 0.08  | 0.00  | 3    | Chloroflexi     | Ktedonobacteria     | Thermogemmatisporales | Unknown              |
| 6146 | 11.20 | 0.29  | 29   | Chloroflexi     | Ktedonobacteria     | Thermogemmatisporales | Unknown              |
| 8492 | 0.03  | 0.00  | 2    | Firmicutes      | Bacilli             | Bacillales            | Staphylococcaceae    |
| 1273 | 0.02  | 0.17  | 41   | Firmicutes      | Bacilli             | Bacillales            | Unknown              |
| 7579 | 0.00  | 1.40  | 17   | Firmicutes      | Bacilli             | Bacillales            | Unknown              |
| 9017 | 0.01  | 25.94 | 488  | Firmicutes      | Bacilli             | Bacillales            | Unknown              |
| 9497 | 0.00  | 0.13  | 11   | Firmicutes      | Bacilli             | Bacillales            | Unknown              |
| 8731 | 0.04  | 2.41  | 26   | Firmicutes      | Bacilli             | Lactobacillales       | Streptococcaceae     |
| 1451 | 0.00  | 0.17  | 2    | Firmicutes      | Bacilli             | Unknown               | Unknown              |
| 2108 | 0.00  | 0.19  | 2    | Firmicutes      | Bacilli             | Unknown               | Unknown              |
| 4091 | 0.02  | 8.46  | 23   | Firmicutes      | Bacilli             | Unknown               | Unknown              |
| 5391 | 0.00  | 0.02  | 18   | Firmicutes      | Bacilli             | Unknown               | Unknown              |
| 5556 | 0.00  | 0.05  | 5    | Firmicutes      | Bacilli             | Unknown               | Unknown              |
| 5711 | 0.00  | 0.17  | 3    | Firmicutes      | Bacilli             | Unknown               | Unknown              |
| 9103 | 0.00  | 0.27  | 1    | Firmicutes      | Bacilli             | Unknown               | Unknown              |
| 9298 | 0.01  | 7.17  | 59   | Firmicutes      | Bacilli             | Unknown               | Unknown              |
| 9487 | 0.01  | 0.00  | 14   | Planctomycetes  | Planctomycetia      | Pirellulales          | Pirellulaceae        |
| 703  | 0.00  | 0.03  | 46   | Proteobacteria  | Alphaproteobacteria | Caulobacterales       | Caulobacteraceae     |
| 665  | 0.03  | 0.00  | 4    | Proteobacteria  | Alphaproteobacteria | Caulobacterales       | Unknown              |
| 2363 | 0.33  | 0.33  | 167  | Proteobacteria  | Alphaproteobacteria | Caulobacterales       | Unknown              |

|      |        |      |     |                 |                     |                    |                     |
|------|--------|------|-----|-----------------|---------------------|--------------------|---------------------|
| 3965 | 5.68   | 3.62 | 12  | Proteobacteria  | Alphaproteobacteria | Rhizobiales        | Bradyrhizobiaceae   |
| 357  | 0.45   | 0.10 | 2   | Proteobacteria  | Alphaproteobacteria | Rhizobiales        | Phyllobacteriaceae  |
| 733  | 1.19   | 3.59 | 108 | Proteobacteria  | Alphaproteobacteria | Rhizobiales        | Unknown             |
| 7348 | 0.00   | 0.32 | 3   | Proteobacteria  | Alphaproteobacteria | Rhizobiales        | Unknown             |
| 3802 | 0.01   | 0.00 | 30  | Proteobacteria  | Alphaproteobacteria | Rhizobiales        | Xanthobacteraceae   |
| 4539 | 0.20   | 0.02 | 4   | Proteobacteria  | Alphaproteobacteria | Rhizobiales        | Xanthobacteraceae   |
| 3315 | 0.52   | 0.44 | 55  | Proteobacteria  | Alphaproteobacteria | Sphingomonadales   | Sphingomonadaceae   |
| 6789 | 0.05   | 0.17 | 1   | Proteobacteria  | Betaproteobacteria  | Burkholderiales    | Burkholderiaceae    |
| 7365 | 0.15   | 0.22 | 1   | Proteobacteria  | Betaproteobacteria  | Burkholderiales    | Burkholderiaceae    |
| 104  | 0.68   | 0.19 | 1   | Proteobacteria  | Betaproteobacteria  | Burkholderiales    | Comamonadaceae      |
| 7510 | 0.12   | 0.05 | 1   | Proteobacteria  | Betaproteobacteria  | Burkholderiales    | Comamonadaceae      |
| 8366 | 0.02   | 0.16 | 11  | Proteobacteria  | Betaproteobacteria  | Burkholderiales    | Comamonadaceae      |
| 9169 | 0.06   | 0.19 | 17  | Proteobacteria  | Betaproteobacteria  | Burkholderiales    | Oxalobacteraceae    |
| 792  | 0.05   | 0.00 | 1   | Proteobacteria  | Betaproteobacteria  | Unknown            | Unknown             |
| 890  | 1.23   | 6.43 | 12  | Proteobacteria  | Betaproteobacteria  | Unknown            | Unknown             |
| 1031 | 0.13   | 0.00 | 1   | Proteobacteria  | Betaproteobacteria  | Unknown            | Unknown             |
| 3634 | 0.26   | 0.00 | 1   | Proteobacteria  | Betaproteobacteria  | Unknown            | Unknown             |
| 3869 | 8.07   | 0.44 | 524 | Proteobacteria  | Betaproteobacteria  | Unknown            | Unknown             |
| 4549 | 0.09   | 0.00 | 1   | Proteobacteria  | Betaproteobacteria  | Unknown            | Unknown             |
| 7326 | 0.12   | 0.00 | 1   | Proteobacteria  | Betaproteobacteria  | Unknown            | Unknown             |
| 9417 | 0.03   | 0.02 | 1   | Proteobacteria  | Betaproteobacteria  | Unknown            | Unknown             |
| 614  | 0.03   | 0.06 | 25  | Proteobacteria  | Gammaproteobacteria | Pseudomonadales    | Moraxellaceae       |
| 9385 | 0.51   | 4.03 | 1   | Proteobacteria  | Gammaproteobacteria | Pseudomonadales    | Pseudomonadaceae    |
| 6837 | 0.00   | 0.44 | 7   | Proteobacteria  | Gammaproteobacteria | Xanthomonadales    | Xanthomonadaceae    |
| 3817 | 0.03   | 0.03 | 3   | Proteobacteria  | Unknown             | Unknown            | Unknown             |
| 8958 | 0.30   | 0.49 | 29  | Proteobacteria  | Unknown             | Unknown            | Unknown             |
| 1499 | 35.98  | 0.19 | 122 | TM7             | TM7-1               | Unknown            | Unknown             |
| 5317 | 0.08   | 0.00 | 2   | TM7             | TM7-1               | Unknown            | Unknown             |
| 5388 | 0.24   | 0.00 | 1   | TM7             | TM7-1               | Unknown            | Unknown             |
| 223  | 107.75 | 0.10 | 11  | Unknown         | Unknown             | Unknown            | Unknown             |
| 3273 | 0.12   | 0.00 | 1   | Unknown         | Unknown             | Unknown            | Unknown             |
| 4298 | 0.00   | 0.02 | 9   | Unknown         | Unknown             | Unknown            | Unknown             |
| 4834 | 0.10   | 0.00 | 2   | Unknown         | Unknown             | Unknown            | Unknown             |
| 5662 | 24.96  | 0.03 | 2   | Unknown         | Unknown             | Unknown            | Unknown             |
| 9264 | 0.05   | 0.32 | 1   | Unknown         | Unknown             | Unknown            | Unknown             |
| 3666 | 0.01   | 0.08 | 4   | Verrucomicrobia | Spartobacteria      | Chthoniobacterales | Chthoniobacteraceae |
| 5571 | 0.45   | 3.84 | 1   | Verrucomicrobia | Spartobacteria      | Chthoniobacterales | Chthoniobacteraceae |
| 8804 | 0.05   | 0.05 | 2   | Verrucomicrobia | Spartobacteria      | Chthoniobacterales | Chthoniobacteraceae |

---
